# Supplementary material
Source: PubMed Central journal article supplement (PMC5731805)
Supplement: krnb-14-12-1353863-s001.pdf [file krnb-14-12-1353863-s001.pdf]

**Table S1. qPCR primers used in the study**

| <b>name</b>   | <b>5'- 3' sequence</b>   |
|---------------|--------------------------|
| Fluc F        | GCGGAGGAGTTGTGTTTGTG     |
| Fluc R        | CGATCTTCCGCCCTTCTTG      |
| Rluc F        | TTTTGTGCGCCATGATTGGG     |
| Rluc R        | CAGGCCATTCATCCCATGATTC   |
| yeast RPL41 F | CGAAATGAGAGCCAAGTGG      |
| yeast RPL41 R | ATGCAATTTAGATCCATTATGAGG |

**Table S2. Antibodies used in the study**

| <b>antibody</b> | <b>source</b>                 |
|-----------------|-------------------------------|
| eIF3a           | Cell Signalling # 2538        |
| eIF3b           | Thermo Scientific # PA5-23278 |
| eIF3h           | Cell Signalling # 3413        |
| eIF3k           | Abcam # 85968                 |
| eIF3l           | Bethyl # A304-753A-T          |
| GAPDH           | Thermo Scientific # PA1-987   |
